# Supplementary material
Source: PubMed Central journal article supplement (PMC3112305)
Supplement: NIHMS291213-supplement-Supp_Figure_S1-S2.pdf [file NIHMS291213-supplement-Supp_Figure_S1-S2.pdf]

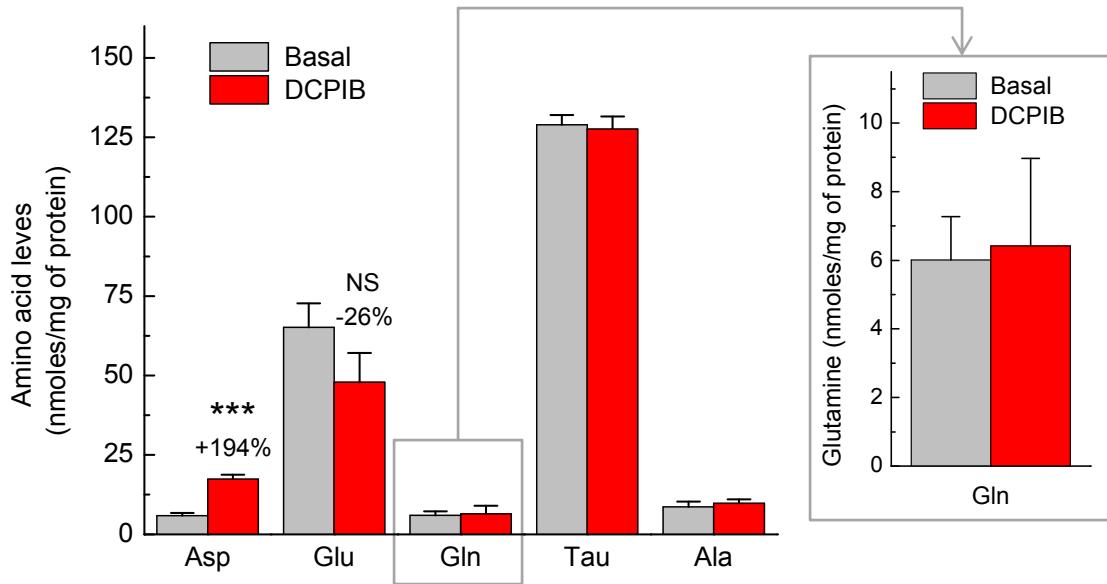

**Hyzinski-García *et al.* Supplemental Fig. 1.**

**Effect of the VRAC blocker DCPIB on intracellular content of L-glutamate, L-glutamine, taurine, and L-alanine.**

Primary rat astrocytes were incubated in Basal media for 30 min with or without 20  $\mu$ M DCPIB. Levels of 5 intracellular amino acids were analyzed in cell lysates using an HPLC assay and normalized to protein content. Data are the mean values  $\pm$  SE of 6 experiments. \*\*\* $p < 0.001$ , vs. basal. *Inset* shows no changes in glutamine levels in DCPIB-treated cells on an expanded scale.

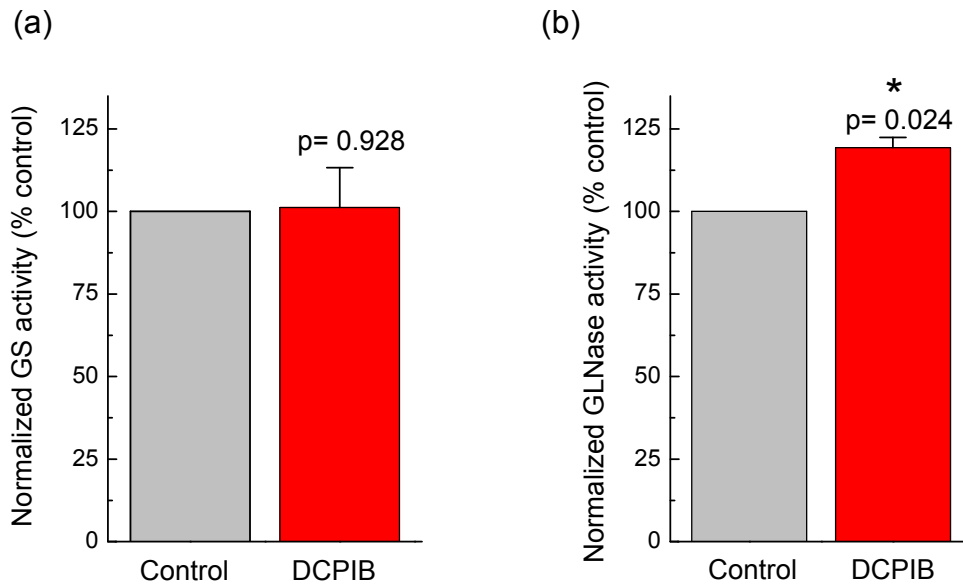

**Hyzinski-García *et al.* Supplemental Fig. 2.**

**Effect of the VRAC blocker DCPIB on enzymatic activities of (a) glutamine synthetase and (b) glutaminase.**

Primary rat astrocytes were incubated in Basal media with L-[<sup>3</sup>H]glutamate or L-[<sup>3</sup>H]glutamine in the presence or absence of 20  $\mu$ M DCPIB. Enzymatic activities were quantified by measuring conversion of L-[<sup>3</sup>H]glutamate to L-[<sup>3</sup>H]glutamine for glutamine synthetase (GS), or L-[<sup>3</sup>H]glutamine to L-[<sup>3</sup>H]glutamate for glutaminase (GLNase) as described in Methods. In each set of experiments enzymatic activities were normalized to controls to account for culture-to-culture variability. Data are the mean values  $\pm$  SE of 6 experiments for GS (a) and 3 experiments for GLNase (b). \* $p < 0.05$  vs. 100%, t-test.
